# Supplementary material for: Replacing H+by Na+or K+in phosphopeptide anions and cations prevents electron capture dissociation
Source: Royal Society of Chemistry journal article supplement (doi:10.1039/c8sc02470g), 2018-01-01
Supplement: c8sc02470g1.pdf [file c8sc02470g1.pdf]

**SUPPORTING INFORMATION**

**Replacing H<sup>+</sup> by Na<sup>+</sup> or K<sup>+</sup> in phosphopeptide anions and cations prevents electron capture dissociation**

Eva-Maria Schneeberger and Kathrin Breuker\*

Institute of Organic Chemistry and Center for Molecular Biosciences Innsbruck (CMBI)  
University of Innsbruck  
Innrain 80/82  
6020 Innsbruck, Austria  
email: [eva-maria.schneeberger@uibk.ac.at](mailto:eva-maria.schneeberger@uibk.ac.at), [kathrin.breuker@uibk.ac.at](mailto:kathrin.breuker@uibk.ac.at)  
website: [www.bioms-breuker.at/](http://www.bioms-breuker.at/)

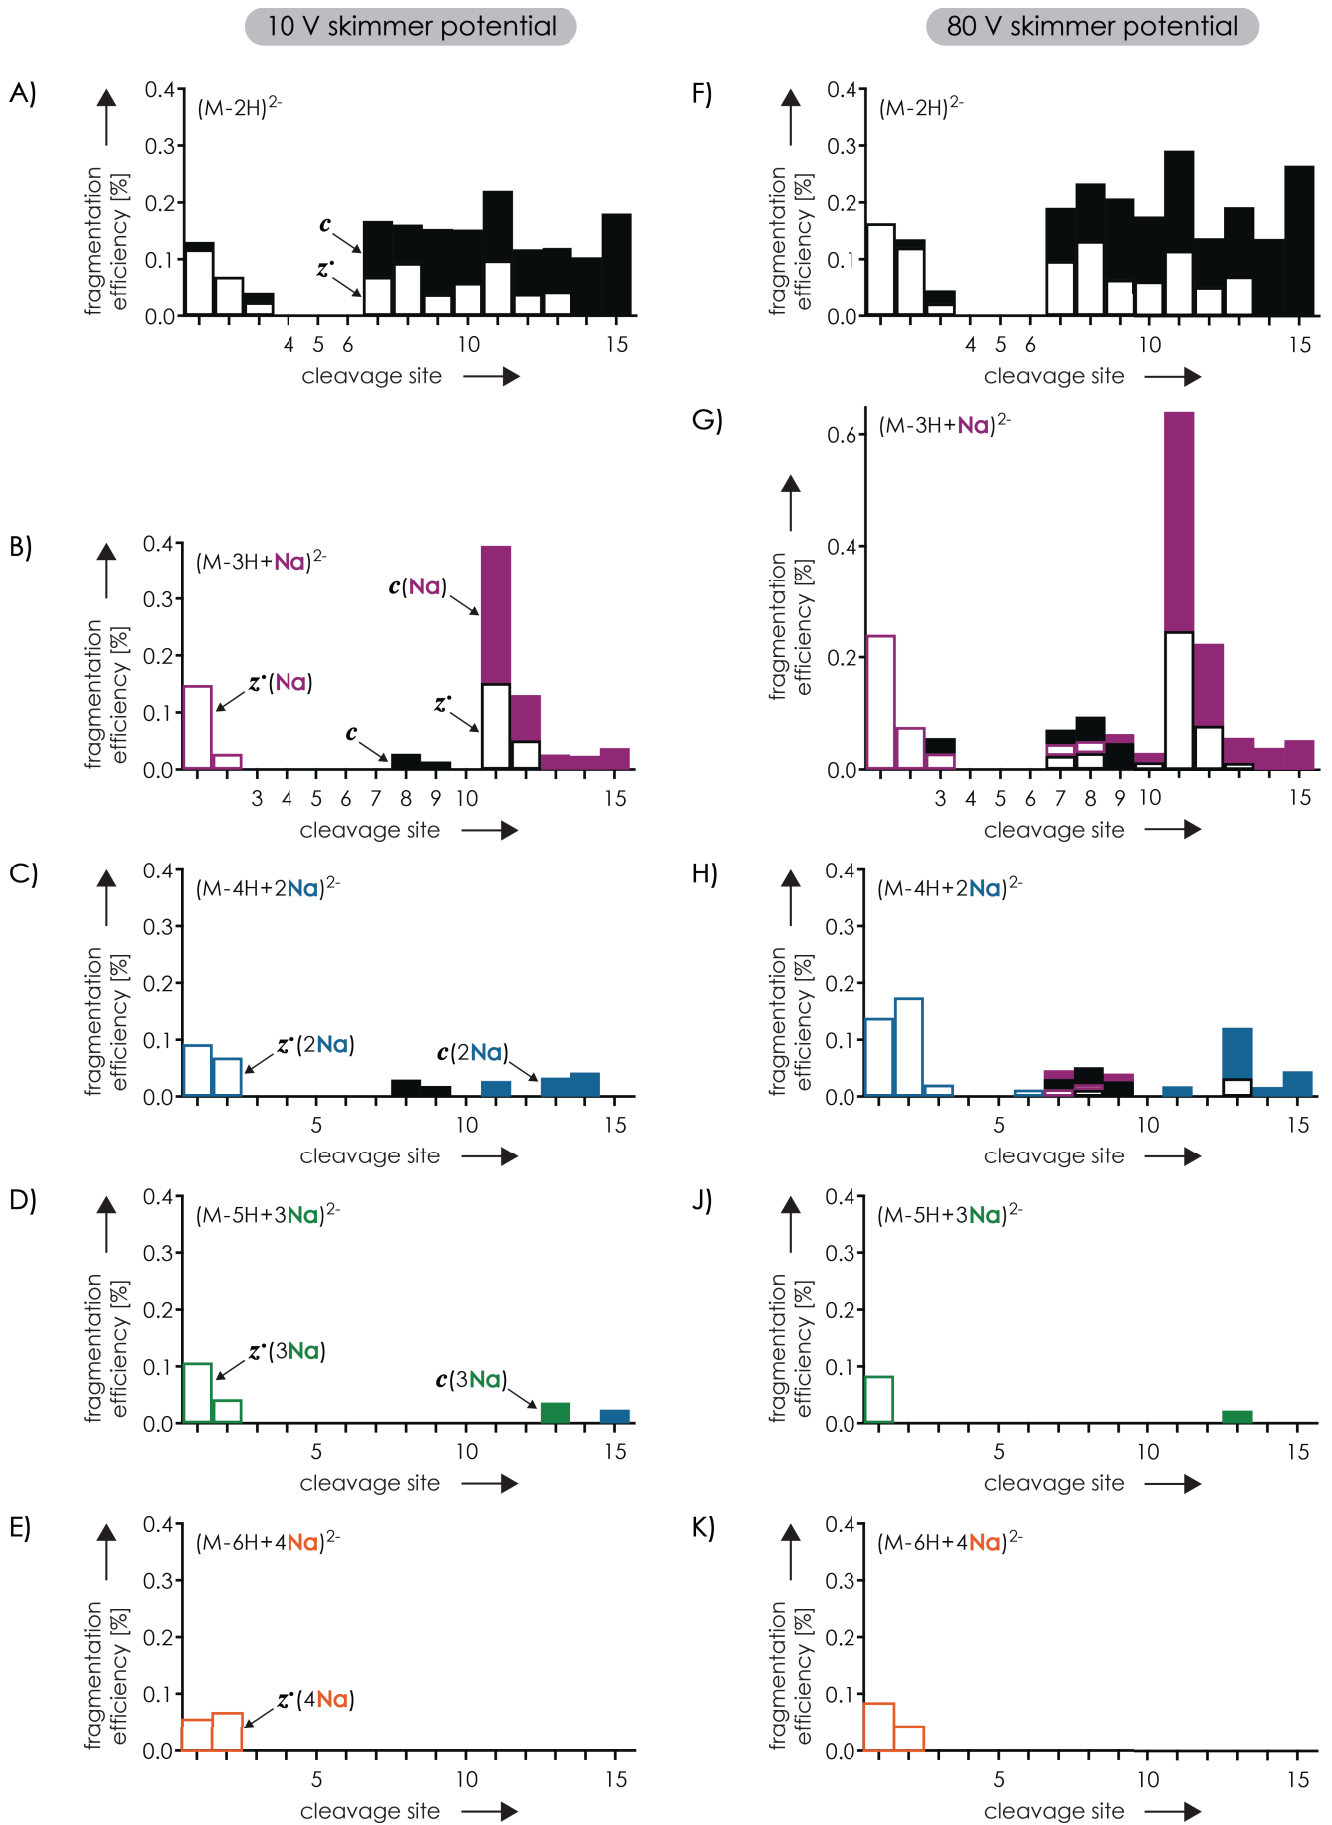

**Figure S1.** Site-specific fragmentation efficiency ( $c$ ,  $z^*$  and  $c'$ ,  $z$  fragments) in niECD of A)  $(M-2H)^{2-}$ , B)  $(M-3H+Na)^{2-}$ , C)  $(M-4H+2Na)^{2-}$ , D)  $(M-5H+3Na)^{2-}$ , and E)  $(M-6H+4Na)^{2-}$  ions using a skimmer potential of 10 V, and of F)  $(M-2H)^{2-}$ , G)  $(M-3H+Na)^{2-}$ , H)  $(M-4H+2Na)^{2-}$ , J)  $(M-5H+3Na)^{2-}$ , and K)  $(M-6H+4Na)^{2-}$  ions using a skimmer potential of 80 V.

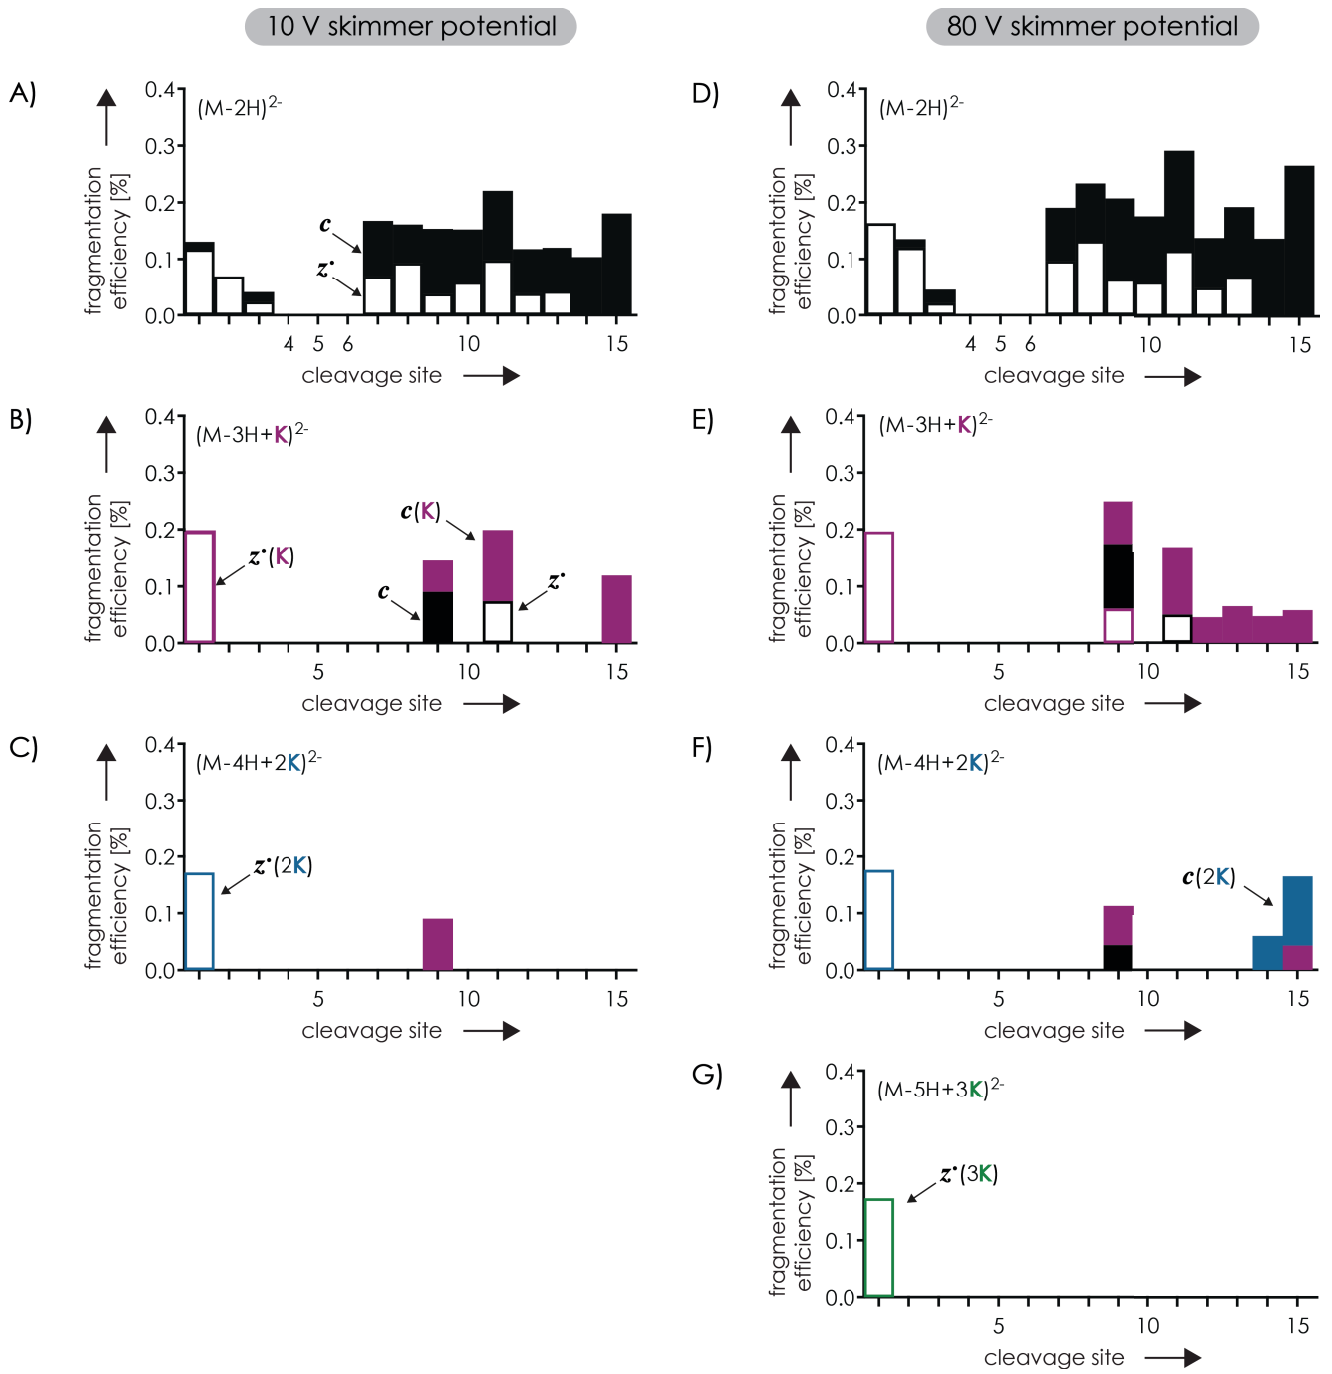

**Figure S2.** Site-specific fragmentation efficiency ( $c$ ,  $z^*$  and  $c^*$ ,  $z$  fragments) in niECD of A)  $(M-2H)^{2-}$ , B)  $(M-3H+K)^{2-}$ , and C)  $(M-4H+2K)^{2-}$  ions using a skimmer potential of 10 V, and of D)  $(M-2H)^{2-}$ , E)  $(M-3H+K)^{2-}$ , F)  $(M-4H+2K)^{2-}$ , and G)  $(M-5H+3K)^{2-}$  ions using a skimmer potential of 80 V.

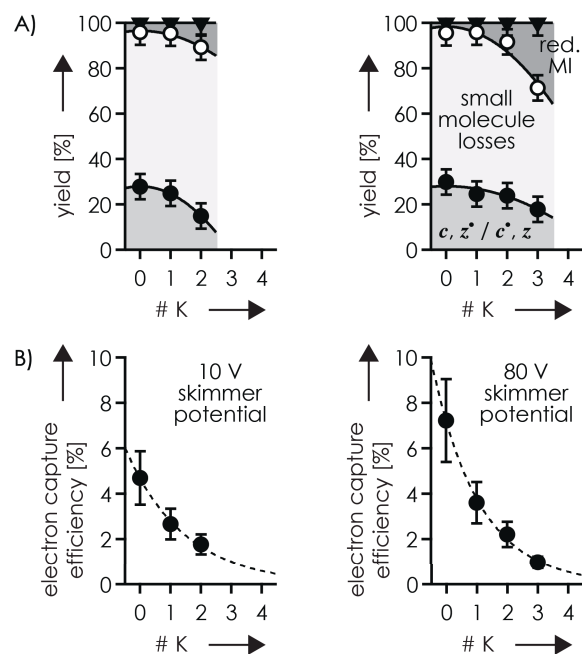

**Figure S3.** A) Percentage stacked area plots illustrating the yield of  $c, z^*$  and  $c^*, z$  fragments (filled circles), products from loss of small molecules (>70%  $\text{NH}_3$ ; <30%  $\text{CO}$ ,  $\text{CONH}_3$ ,  $\text{C}_2\text{H}_6\text{O}$ ,  $\text{C}_2\text{H}_4\text{O}_2$ ) from reduced molecular ions (open circles), and reduced molecular ions (triangles) of which ~20% showed loss of  $\text{H}^+$  but not  $\text{K}^+$ , from niECD of phosphopeptide anions with a net charge of 2- at 10 V (left) and 80 V (right) skimmer potential and B) corresponding electron capture efficiency versus the number of  $\text{K}^+$  attached; solid lines in A are meant to guide the eye and dashed lines in B are exponential fit functions.

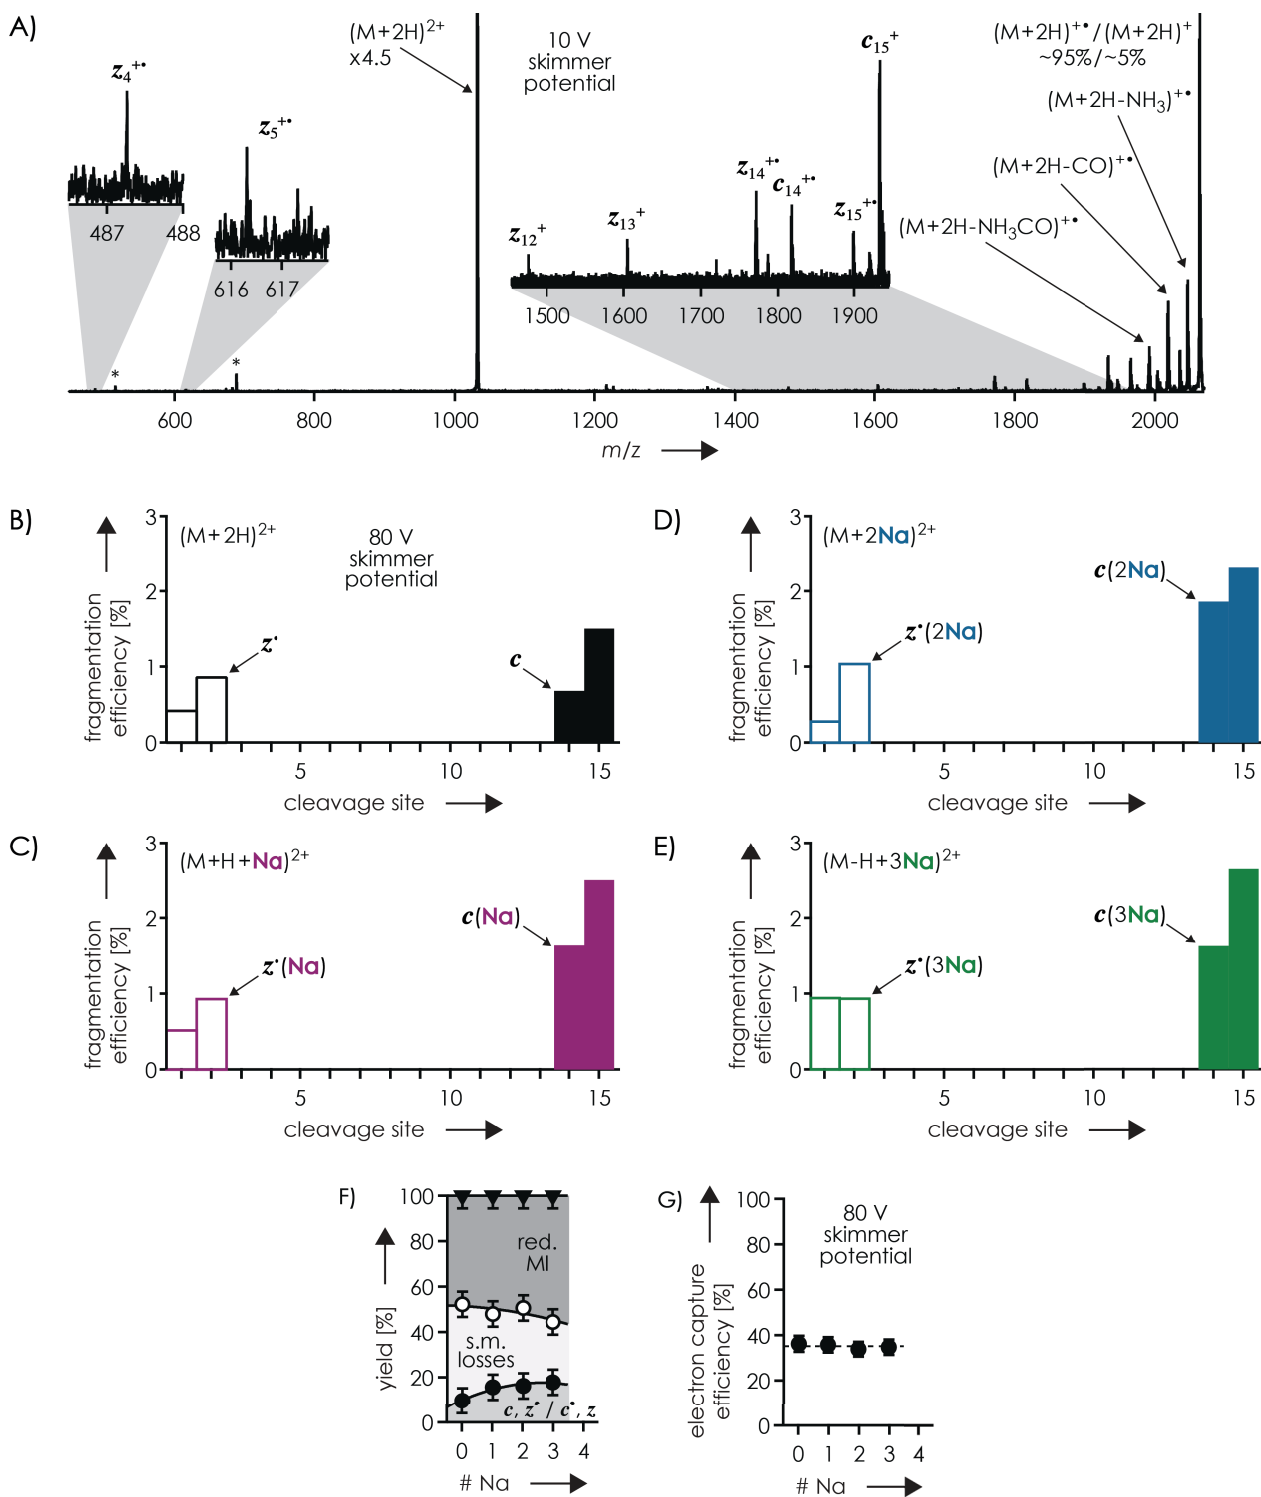

**Figure S4.** A) Spectrum from ECD of  $(M+2H)^{2+}$  ions using a skimmer potential of 10 V (asterisks indicate harmonic signals), and site-specific fragmentation efficiency ( $c$ ,  $z'$  and  $c'$ ,  $z$  fragments) in ECD of B)  $(M+2H)^{2+}$ , C)  $(M+H+Na)^{2+}$ , D)  $(M+2Na)^{2+}$ , and E)  $(M-H+3Na)^{2+}$  ions at 80 V skimmer potential; F) yield of  $c$  and  $z'$  fragments, products from loss of small molecules from reduced molecular ions, and reduced molecular ions from ECD of phosphopeptide ions with a net charge of 2+ at 80 V skimmer potential and G) corresponding electron capture efficiency versus the number of  $Na^+$  attached, lines in F and G are meant to guide the eye.

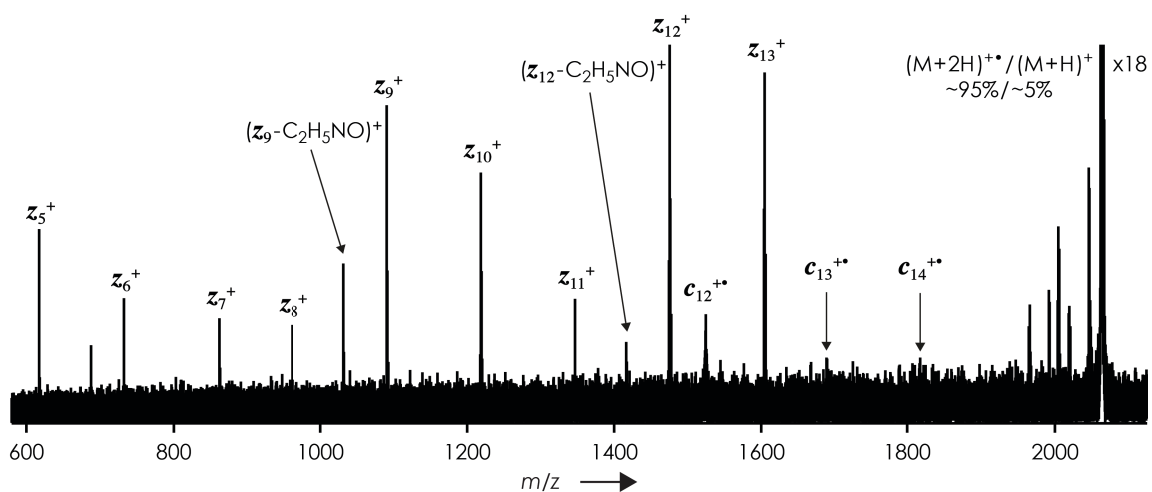

**Figure S5.** Spectrum from IRMPD (25% laser power, 180 ms irradiation time) of  $(M+2H)^{++}$  (~95%) and  $(M+H)^+$  (~5%) ions formed by ECD of  $(M+2H)^{2+}$  ions at 80 V skimmer potential.

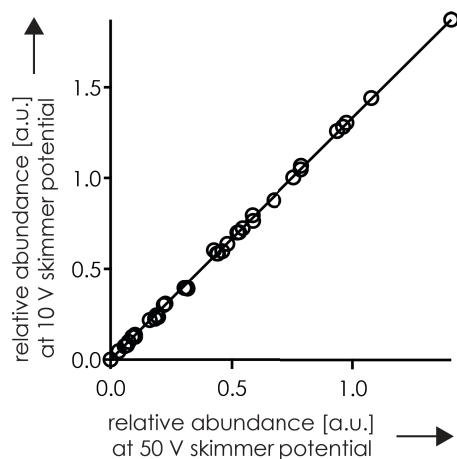

**Figure S6.** Relative abundance of  $c$ ,  $z^*$  and  $c^*$ ,  $z$  fragments from ECD of  $(M+3H)^{3+}$  ions at 10 V versus 50 V skimmer potential, the solid line shows a linear fit with a correlation coefficient of 0.999807.

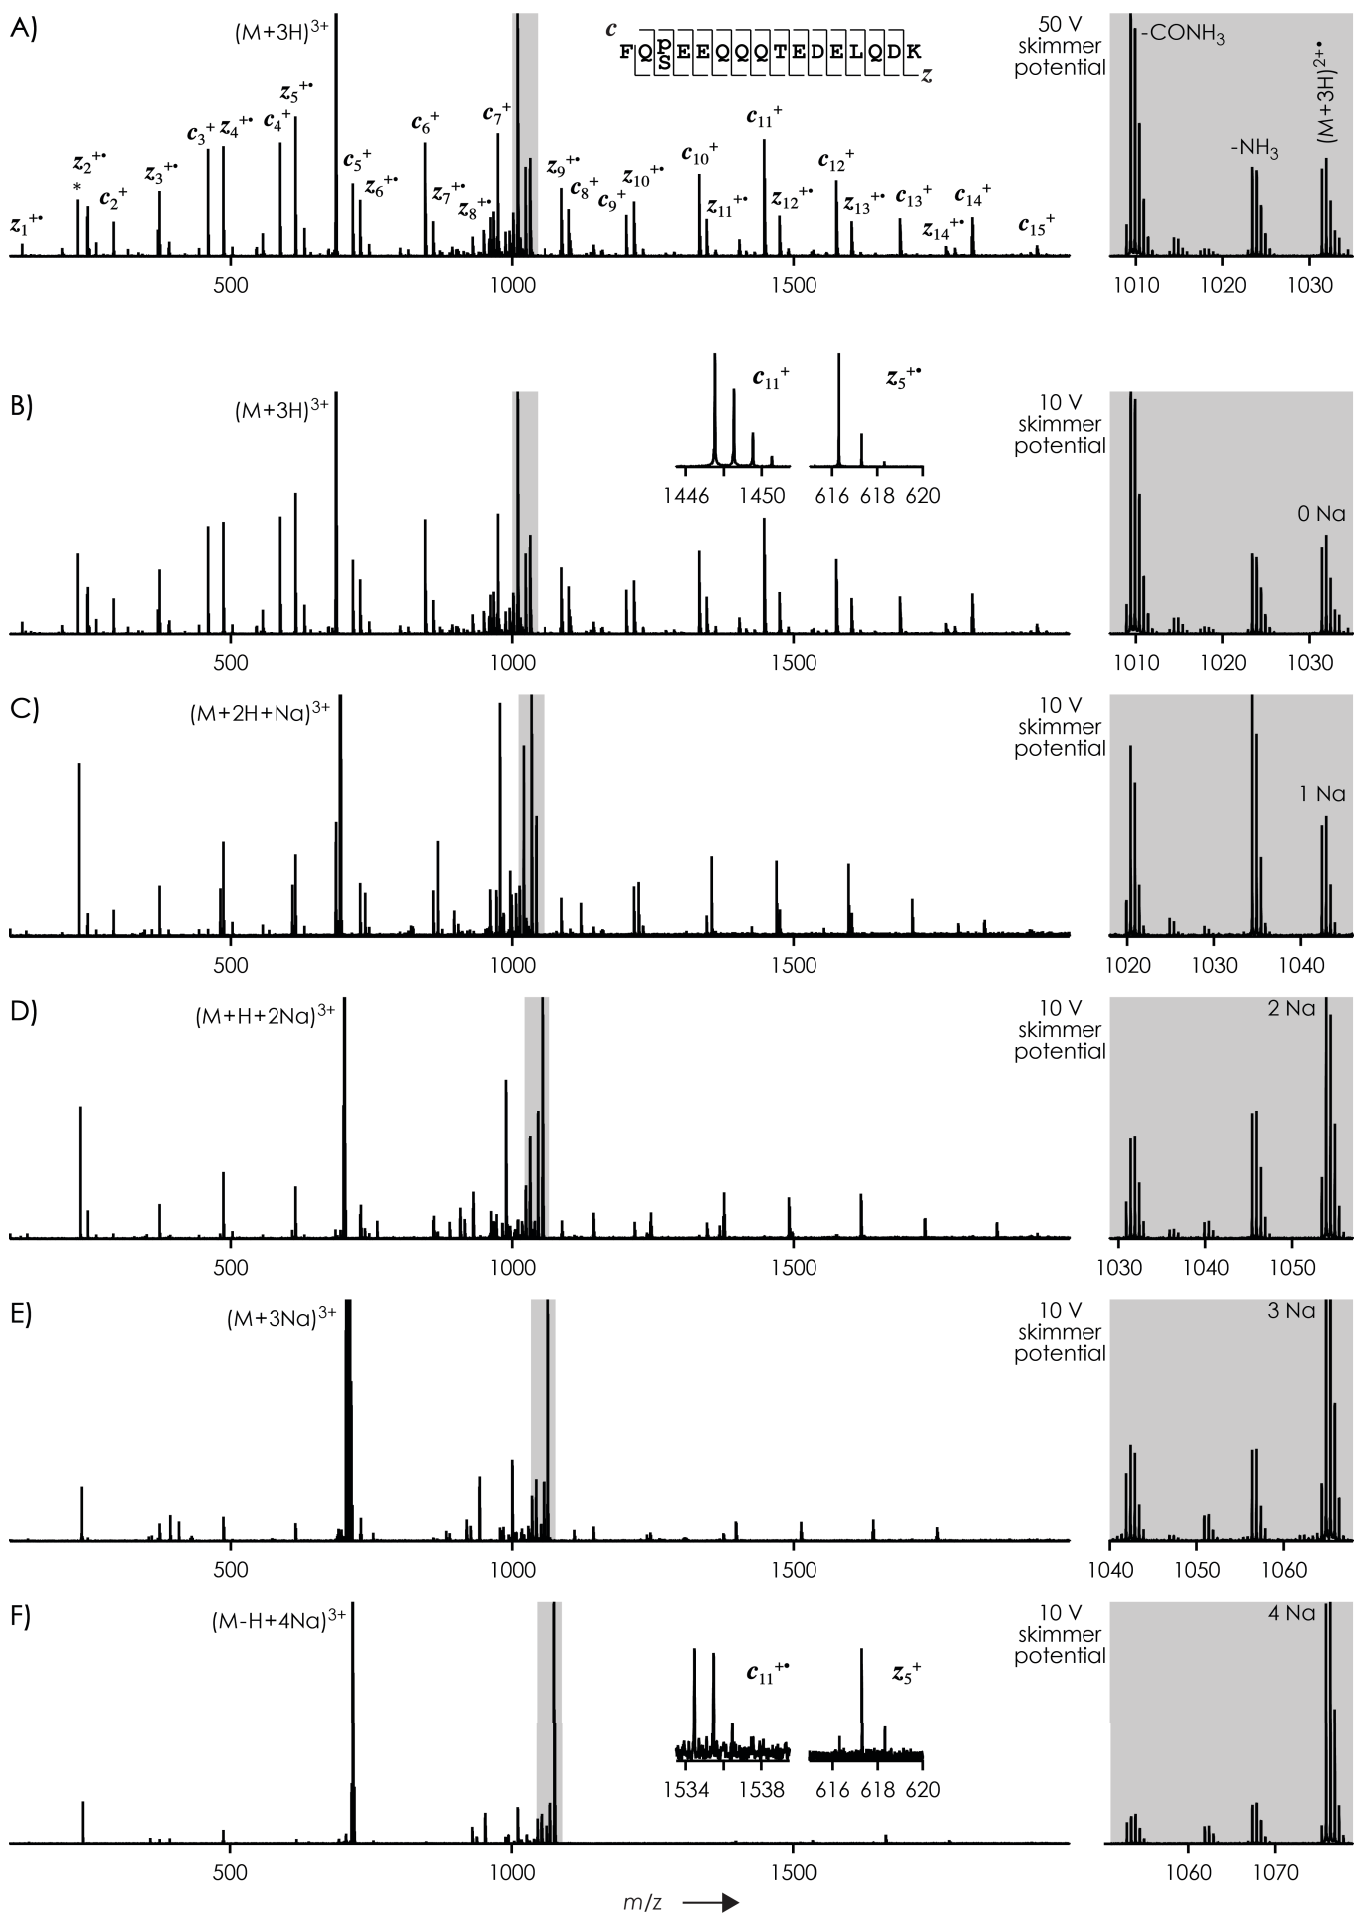

**Figure S7.** ECD spectra of phosphopeptide ions with a net charge of 3+ and up to four Na<sup>+</sup> attached as indicated.

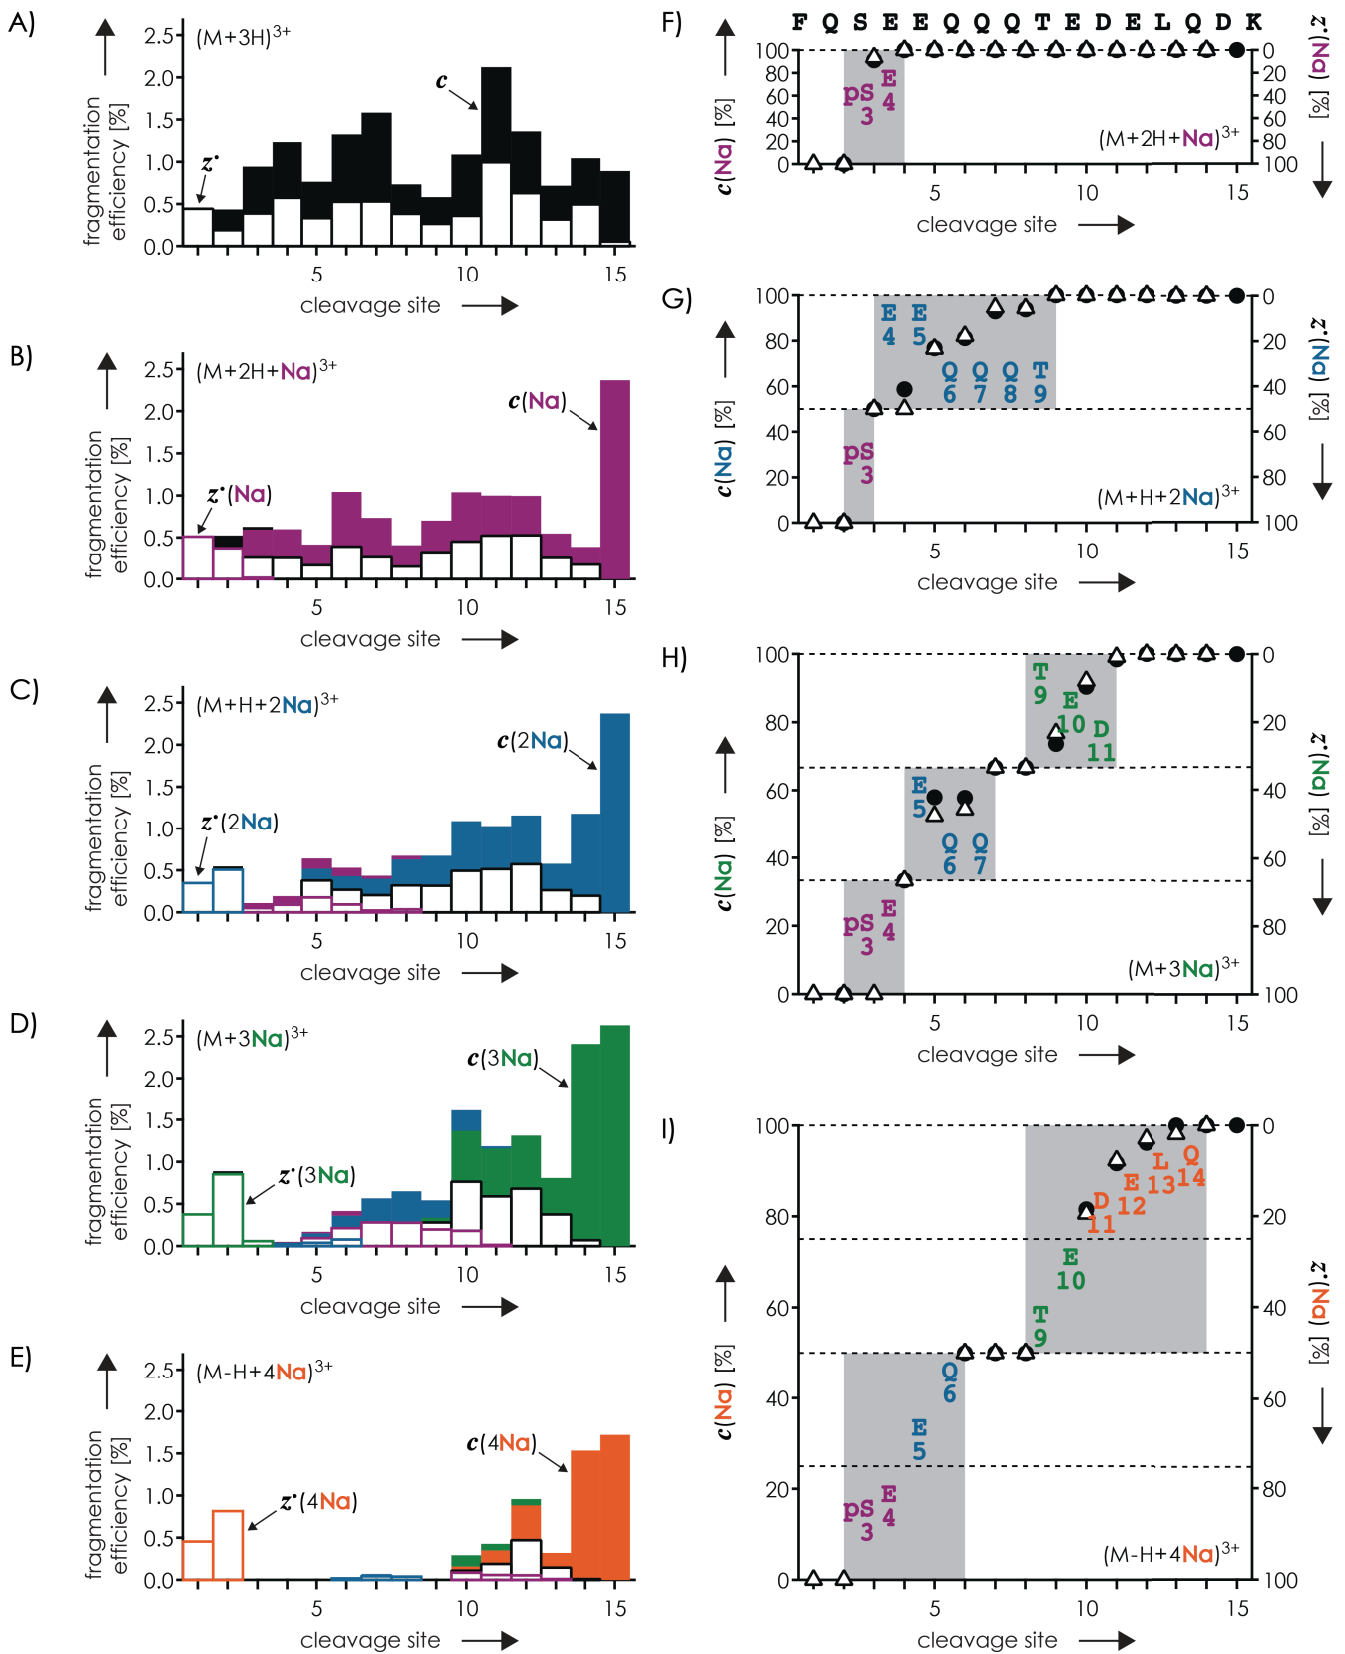

**Figure S8.** Site-specific fragmentation efficiency ( $c$ ,  $z'$  and  $c'$ ,  $z$  fragments) in ECD of A) (M+3H)<sup>3+</sup>, B) (M+2H+Na)<sup>3+</sup>, C) (M+H+2Na)<sup>3+</sup>, D) (M+3Na)<sup>3+</sup>, and E) (M-H+4Na)<sup>3+</sup> ions at 10 V skimmer potential and F) - I) corresponding Na<sup>+</sup> occupancy of  $c$  or  $c'$  (left axes) and  $z'$  or  $z$  (right axes) fragments with up to four Na<sup>+</sup> attached.



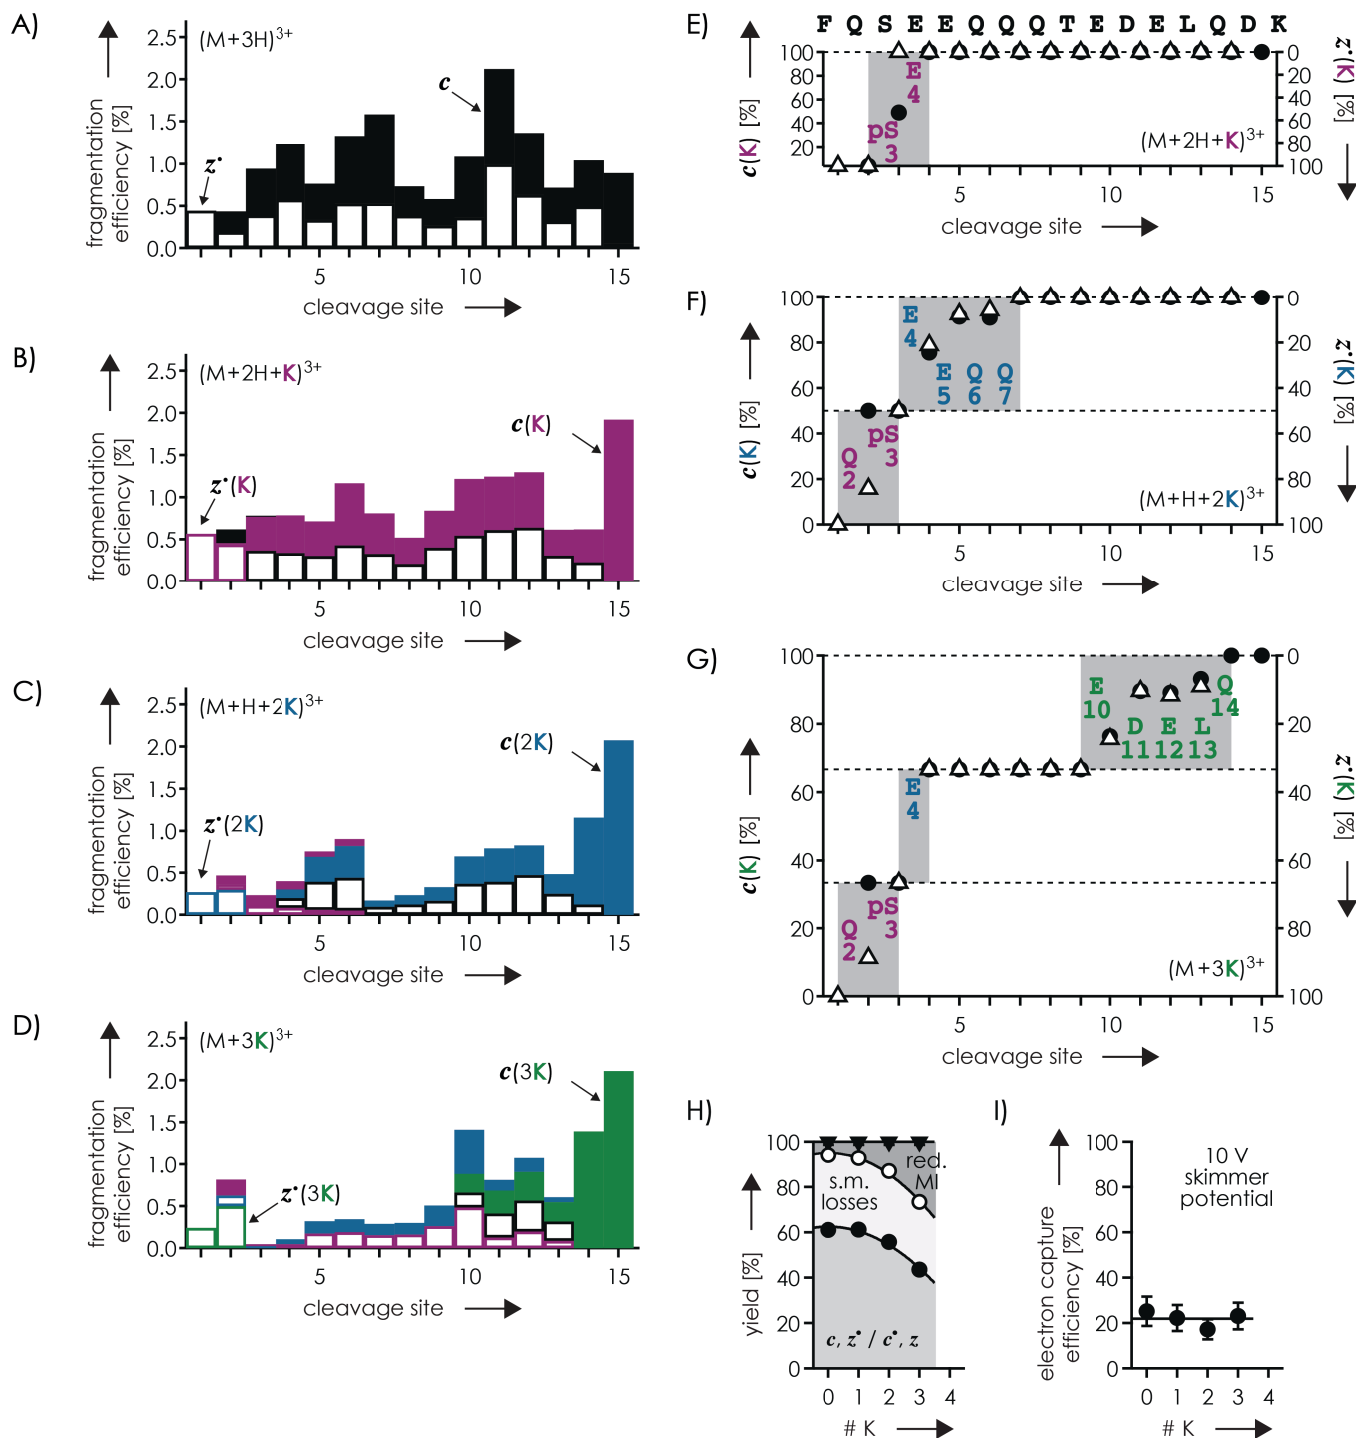

**Figure S9.** Site-specific fragmentation efficiency ( $c$ ,  $z'$  and  $c'$ ,  $z$  fragments) in ECD of A)  $(M+3H)^{3+}$ , B)  $(M+2H+K)^{3+}$ , C)  $(M+H+2K)^{3+}$ , and D)  $(M+3K)^{3+}$  ions at 10 V skimmer potential and E)-G) corresponding  $K^+$  occupancy of  $c$  or  $c'$  (left axes) and  $z'$  or  $z$  (right axes) fragments with up to three  $K^+$  attached; H) yield of  $c$ ,  $z'$  and  $c'$ ,  $z$  fragments, products from loss of small molecules from reduced molecular ions, and reduced molecular ions from ECD of phosphopeptide ions with a net charge of  $3+$  at 10 V skimmer potential and I) corresponding electron capture efficiency versus the number of  $K^+$  attached

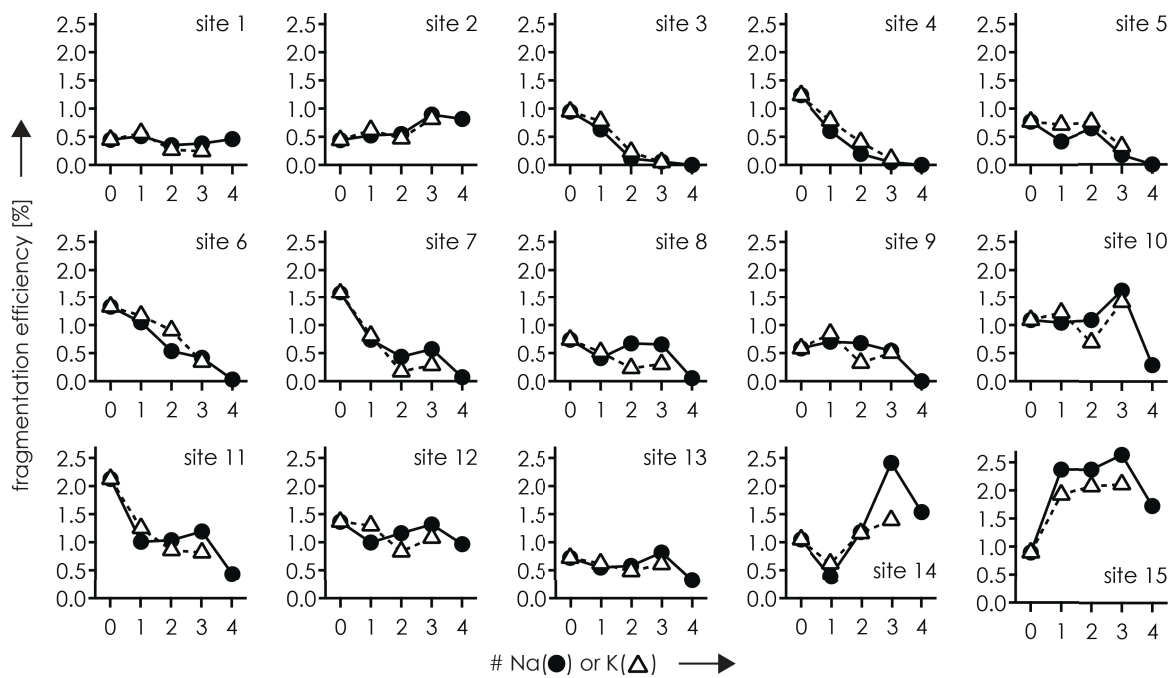

**Figure S10.** Site-specific fragmentation efficiency ( $c$ ,  $z^*$  and  $c^*$ ,  $z$  fragments) in ECD of phosphopeptide ions with a net charge of 3+ versus the number of Na<sup>+</sup> (circles) or K<sup>+</sup> (triangles) attached.

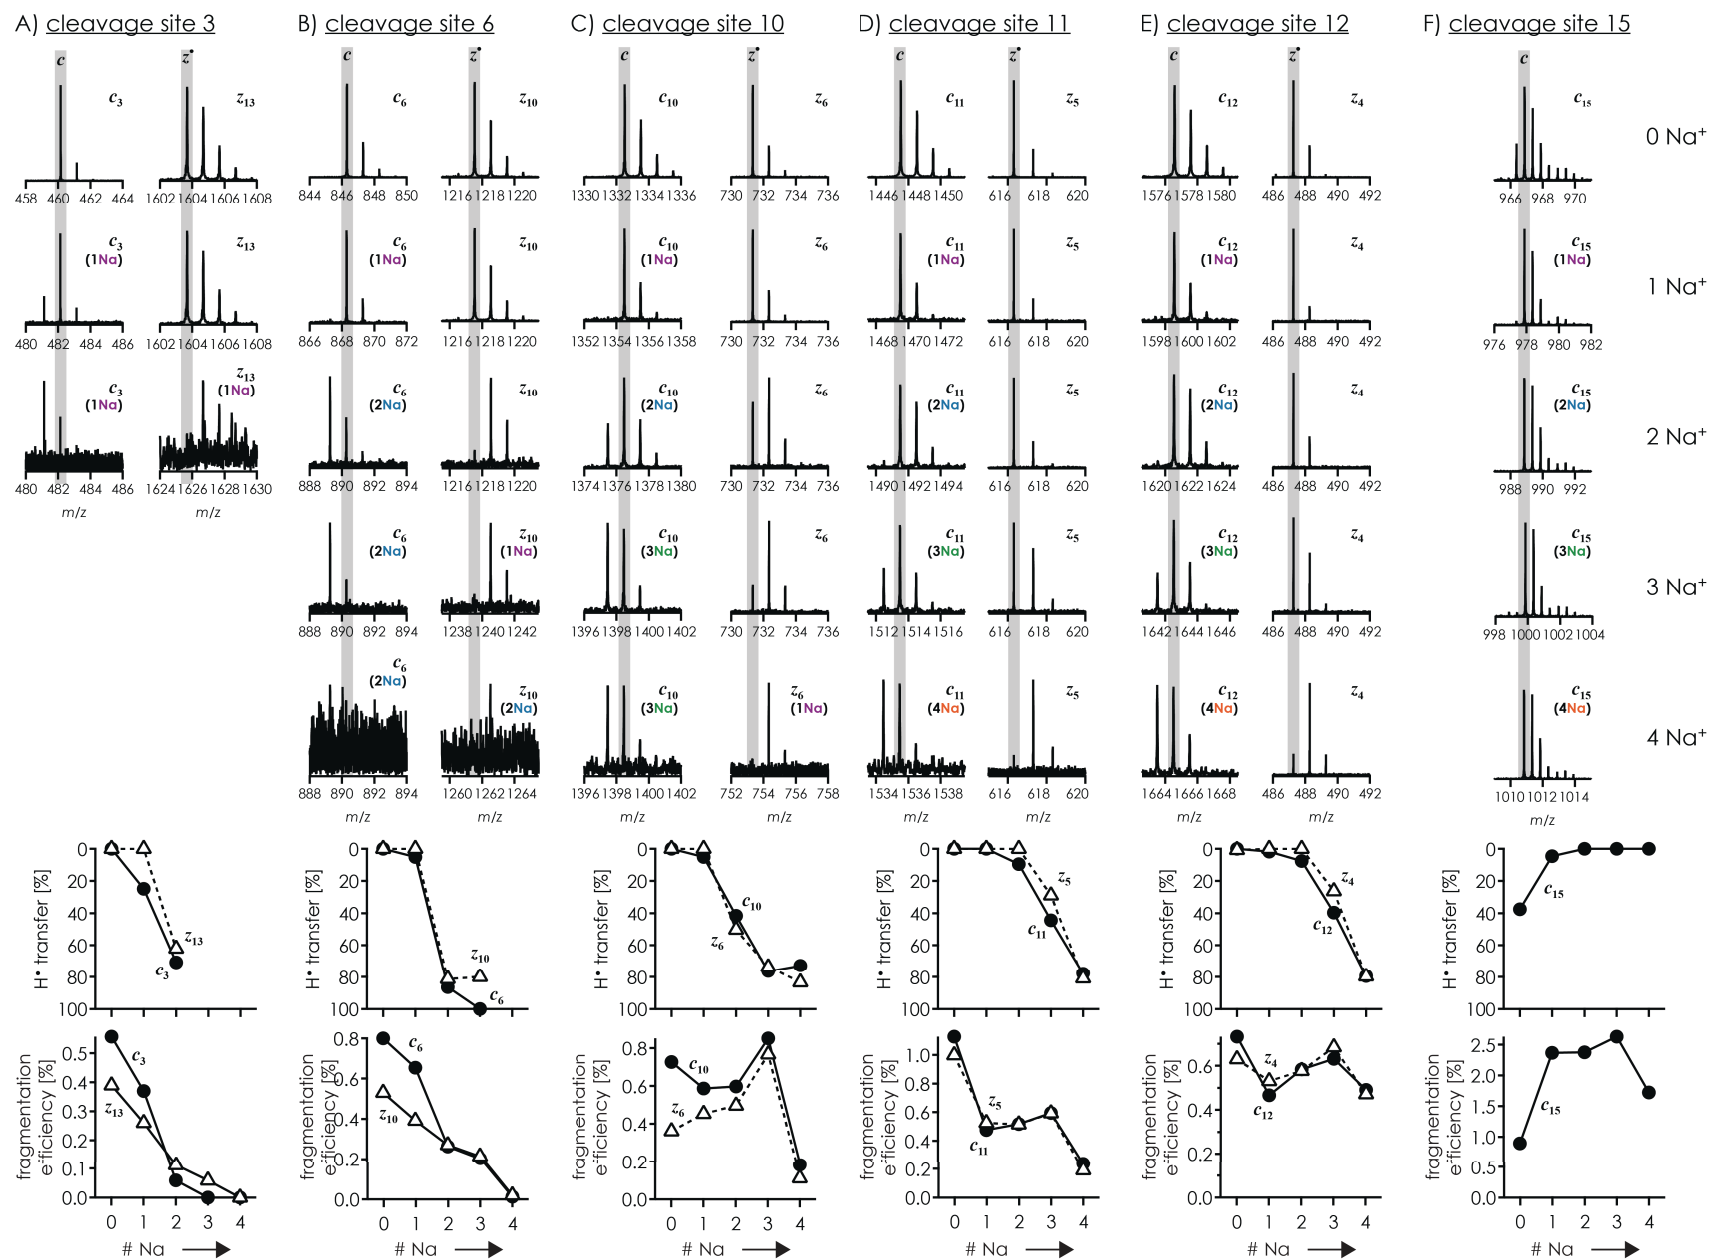

**Figure S11.** Hydrogen atom transfer between  $c$  and  $z'$  fragments and fragmentation efficiency in ECD of phosphopeptide ions with a net charge of 3+ and up to four Na<sup>+</sup> attached, illustrated for cleavage sites A) 3, B) 6, C) 10, D) 11, E) 12, and F) 15.

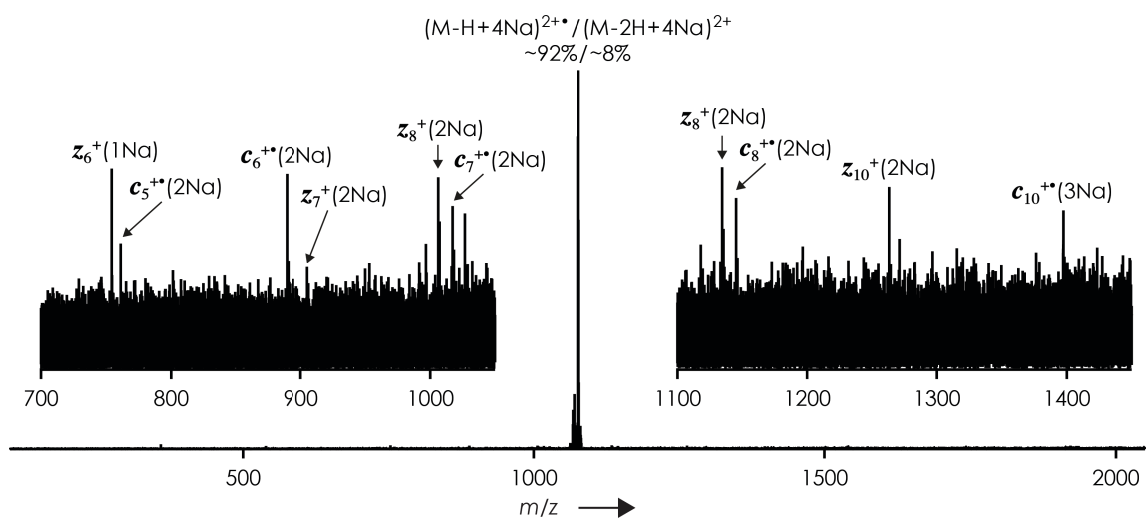

**Figure S12.** Spectrum from IRMPD (25% laser power, 180 ms irradiation time) of  $(M-H+4Na)^{2+\bullet}$  ( $\sim 92\%$ ) and  $(M-2H+4Na)^{2+}$  ( $\sim 8\%$ ) ions formed by ECD of  $(M-H+4Na)^{3+}$  ions at 10 V skimmer potential.
